# Supplementary material for: Diesel Exhaust Exposure and the Risk of Lung Cancer—A Review of the Epidemiological Evidence
Source: Int J Environ Res Public Health. 2014 Jan 27;11(2):1312–40. doi: 10.3390/ijerph110201312 (PMC3945540; doi:10.3390/ijerph110201312)
Supplement: Supplementary File 1 — Supplementary Information (PDF, 126 KB) [file ijerph-11-01312-s001.pdf]

# Diesel Exhaust Exposure and the Risk of Lung Cancer—A Review of the Epidemiological Evidence

**Table S1.** Data points estimated for Figure 1 (cohort studies).

| Study        | Job title                | Exposure * level<br>( $\mu\text{g}/\text{m}^3$ ) | Exposure **<br>duration (Y) | Cumulative doses<br>( $\mu\text{g}/\text{m}^3\text{-Y}$ ) | RR   |
|--------------|--------------------------|--------------------------------------------------|-----------------------------|-----------------------------------------------------------|------|
| Garshick [1] | Engineer/Conductor       | 70                                               | 2.5                         | 175                                                       | 1.31 |
|              |                          |                                                  | 7.5                         | 525                                                       | 1.23 |
|              |                          |                                                  | 12.5                        | 875                                                       | 1.23 |
|              |                          |                                                  | 17.5                        | 1,225                                                     | 1.16 |
|              |                          |                                                  | 30                          | 2,100                                                     | 1.22 |
| Garshick [2] | Long-haul driver         | 70                                               | 20                          | 1,400                                                     | 1.4  |
|              | Pickup driver            | 70                                               | 20                          | 1,400                                                     | 2.21 |
|              | Dockworker               | 190                                              | 20                          | 3,800                                                     | 2.02 |
|              | Combination workers      | 190                                              | 20                          | 3,800                                                     | 2.34 |
| Rafnsson [3] | Truck driver             | 70                                               | 1.5                         | 105                                                       | 2.7  |
|              |                          |                                                  | 6                           | 420                                                       | 2.46 |
|              |                          |                                                  | 25                          | 1,750                                                     | 0.68 |
|              | Taxi driver              | 70                                               | 38                          | 2,450                                                     | 2.32 |
|              |                          |                                                  | 69                          | 42                                                        | 0.59 |
|              |                          |                                                  | 35                          | 2,450                                                     | 1.6  |
| Schenker [4] | Railway workers          | 70                                               | 15                          | 1,050                                                     | 0.83 |
|              |                          |                                                  | 25                          | 1,750                                                     | 0.84 |
|              |                          |                                                  | 35                          | 2,450                                                     | 0.91 |
| Wong [5]     | Heavy equipment operator | 260                                              | 2.5                         | 650                                                       | 0.45 |
|              |                          |                                                  | 7                           | 1,820                                                     | 0.75 |
|              |                          |                                                  | 12                          | 3,120                                                     | 1.08 |
|              |                          |                                                  | 17                          | 4,420                                                     | 1.02 |
|              |                          |                                                  | 30                          | 7,800                                                     | 1.07 |
| Paradis [6]  | Bus driver               | 70                                               | 15                          | 1,050                                                     | 1.01 |
|              |                          |                                                  | 35                          | 2,100                                                     | 0.85 |

Notes: \* Exposure levels estimated according to MEGA-JEM; \*\* Exposure information given by published studies.

**Table S2.** Data points estimated for Figure 2 (case-control studies).

| Study               | Job title                | Exposure * level<br>( $\mu\text{g}/\text{m}^3$ ) | Exposure **<br>duration (Y) | Cumulative doses<br>( $\mu\text{g}/\text{m}^3\text{-Y}$ ) | RR   |
|---------------------|--------------------------|--------------------------------------------------|-----------------------------|-----------------------------------------------------------|------|
| Boffetta [7]        | Truck driver             | 70                                               | 8                           | 560                                                       | 1.83 |
|                     |                          |                                                  | 23                          | 1,610                                                     | 0.94 |
|                     |                          |                                                  | 36                          | 2,520                                                     | 1.17 |
| Brüske-Hohlfeld [8] | Professional driver      | 70                                               | 1.5                         | 105                                                       | 1.69 |
|                     |                          |                                                  | 6.5                         | 455                                                       | 1.09 |
|                     |                          |                                                  | 15                          | 1,050                                                     | 2.02 |
|                     |                          |                                                  | 25                          | 1,750                                                     | 1.15 |
|                     |                          |                                                  | 35                          | 2,450                                                     | 1.51 |
| Damber [9]          | Driver                   | 70                                               | 11                          | 770                                                       | 1.0  |
|                     |                          |                                                  | 30                          | 2,100                                                     | 1.1  |
| Hayes [10]          | Truck driver             | 70                                               | 5                           | 350                                                       | 1.0  |
|                     |                          |                                                  | 25                          | 1,750                                                     | 1.5  |
|                     | Heavy equipment operator | 260                                              | 5                           | 1,300                                                     | 1.5  |
|                     |                          |                                                  | 25                          | 6,500                                                     | 2.1  |
|                     | Bus driver               | 70                                               | 5                           | 350                                                       | 1.1  |
|                     |                          |                                                  | 25                          | 1,750                                                     | 1.7  |
|                     | Taxi driver              | 70                                               | 5                           | 350                                                       | 2.0  |
|                     |                          |                                                  | 25                          | 1,750                                                     | 2.0  |
|                     | Other Driver             | 70                                               | 5                           | 350                                                       | 0.9  |
|                     |                          |                                                  | 25                          | 1,750                                                     | 0.6  |
| Steenland [11]      | Diesel truck driver      | 70                                               | 5                           | 900                                                       | 1.0  |
|                     |                          |                                                  | 25                          | 4,500                                                     | 2.1  |
|                     |                          |                                                  | 12                          | 840                                                       | 1.27 |
|                     | Gasoline truck driver    | 70                                               | 30                          | 2,100                                                     | 1.26 |
|                     |                          |                                                  | 37                          | 2,590                                                     | 1.89 |
|                     |                          |                                                  | 12                          | 840                                                       | 1.24 |
|                     | Both truck driver        | 70                                               | 30                          | 2,100                                                     | 1.1  |
|                     |                          |                                                  | 37                          | 2,590                                                     | 1.34 |
|                     |                          |                                                  | 12                          | 840                                                       | 1.24 |
|                     | Mechanics                | 180                                              | 30                          | 2,100                                                     | 1.15 |
|                     |                          |                                                  | 37                          | 2,590                                                     | 1.34 |
|                     |                          |                                                  | 12                          | 840                                                       | 1.24 |
| Swanson [12]        | Dock workers             | 190                                              | 30                          | 2,100                                                     | 1.1  |
|                     |                          |                                                  | 37                          | 2,590                                                     | 1.34 |
|                     |                          |                                                  | 12                          | 840                                                       | 1.24 |
|                     | Mechanics                | 180                                              | 30                          | 2,100                                                     | 1.15 |
|                     |                          |                                                  | 37                          | 2,590                                                     | 1.34 |
|                     |                          |                                                  | 12                          | 840                                                       | 1.24 |
|                     | Mechanics                | 180                                              | 30                          | 2,100                                                     | 1.15 |
|                     |                          |                                                  | 37                          | 2,590                                                     | 1.34 |
|                     |                          |                                                  | 12                          | 840                                                       | 1.24 |
|                     | Mechanics                | 180                                              | 30                          | 2,100                                                     | 1.15 |
|                     |                          |                                                  | 37                          | 2,590                                                     | 1.34 |
|                     |                          |                                                  | 12                          | 840                                                       | 1.24 |
| Silverman [13] **   | Mechanics                | 180                                              | 5                           | 900                                                       | 1.3  |
|                     |                          |                                                  | 15                          | 2,700                                                     | 2.2  |
|                     |                          |                                                  | 30                          | 5,400                                                     | 1.5  |
| Möhner [14] **      |                          |                                                  |                             | 37.5                                                      | 0.74 |
|                     |                          |                                                  |                             | 304                                                       | 1.54 |
|                     |                          |                                                  |                             | 536                                                       | 2.83 |
| Möhner [14] **      |                          |                                                  |                             | 1,279                                                     | 1.77 |
|                     |                          |                                                  |                             | 2,375                                                     | 1.04 |

Notes: \* Exposure levels estimated according to MEGA-JEM; \*\* Exposure information given by published studies.

## References

1. Garshick, E.; Laden, F.; Hart, J.E.; Smith, T.J.; Rosner, B. Smoking imputation and lung cancer in railroad workers exposed to diesel exhaust. *Amer. J. Ind. Med.* **2006**, *49*, 709–718.
2. Garshick, E.; Laden, F.; Hart, J.E.; Rosner, B.; Davis, M.E.; Eisen, E.A.; Smith, T.J. Lung cancer and vehicle exhaust in trucking industry workers. *Environ. Health Perspect.* **2008**, *116*, 1327–1332.
3. Rafnsson, V.; Gunnarsdottir, H. Mortality among professional drivers. *Scand. J. Work Environ. Health* **1991**, *17*, 312–317.
4. Schenker, M.B.; Smith, R.; Munoz, A.; Woskie, S.; Spezier, F.E. Diesel exposure and mortality among railroad workers: Results of a pilot study. *Brit. J. Ind. Med.* **1984**, *41*, 320–327.
5. Wong, O.; Morgan, R.K.; Kheifets, L.; Larson, S.R.; Whorton, M.D. Mortality among members of a heavy construction equipment operators union with potential exposure to diesel exhaust emission. *Brit. J. Ind. Med.* **1985**, *42*, 435–448.
6. Paradis, G.; Theriault, G.; Tremblay, C. Mortality in a historical cohort of bus drivers. *Int. J. Epidemiol.* **1989**, *18*, 397–402.
7. Boffetta, P.; Harris, R.E.; Wynder, E.L. Case-control study on occupational exposure to diesel exhaust and lung cancer risk. *Amer. J. Ind. Med.* **1990**, *17*, 577–591.
8. Brüske-Hohlfeld, I.; Möhner, M.; Ahrens, W.; Pohlabein, H.; Heinrich, J.; Kreuzer, M.; Jöckel, K.H.; Wichmann, H.E. Lung cancer risk in male workers occupationally exposed to diesel motor emissions in Germany. *Amer. J. Ind. Med.* **1999**, *36*, 405–414.
9. Damberg, L.A.; Larsson, L.G. Occupation and male lung cancer: A case-control study in northern Sweden. *Brit. J. Ind. Med.* **1987**, *44*, 446–453.
10. Hayes, R.B.; Thomas, T.; Silverman, D.T.; Vineis, P.; Blot, W.J.; Mason, T.J.; Pickle, L.W.; Correa, P.; Fontham, E.T.; Schoenberg, J.B. Lung cancer in motor exhaust-related occupations. *Amer. J. Ind. Med.* **1989**, *16*, 685–695.
11. Steenland, N.K.; Silverman, D.T.; Hornung, R.W. Case-control study of lung cancer and truck driving in the Teamster Union. *Amer. J. Public Health* **1990**, *80*, 670–674.
12. Swanson, G.M.; Lin, C.S.; Burns, P.B. Diversity in the association between occupation and lung cancer among black and white men. *Cancer Epidemiol. Biomarkers Prev.* **1993**, *2*, 313–320.
13. Silverman, D.T.; Samanic, C.M.; Lubin, J.H.; Blair, A.E.; Stewart, P.A.; Vermeulen, R.; Coble, J.B.; Rothman, N.; Schleiff, P.L.; Travis, W.D.; *et al.* The diesel exhaust in miners study: A nested case-control study of lung cancer and diesel exhaust. *J. Nat. Cancer Inst.* **2012**, *104*, 855–868.
14. Möhner, M.; Kersten, N.; Gellissen, J. Diesel motor exhaust and lung cancer mortality: Reanalysis of a cohort study in potash miners. *Eur. J. Epidemiol.* **2013**, *28*, 159–168.
